# Supplementary material
Source: Atypon-hosted journal article supplement (https://805.library.nashville.org/Record/CARL0000290980/DownloadSupplementalFile?fileId=99)
Supplement: DownloadSupplementalFile [file DownloadSupplementalFile]

## **Nashville Room Oversize Collection, 1845-2010 (bulk 1970-1995)**

### **Collection Summary**

**Creator:** Intentionally assembled by Nashville Room staff, beginning at an unknown date, probably in the late 1960s, and collected on an ongoing basis.

**Title:** Nashville Room Oversize Collection

**Inclusive Dates:** 1845-2010 (bulk 1970-1995)

**Summary/Abstract:** Genealogical charts of prominent families and related materials; posters related to Nashville and Tennessee events and history; diplomas; certificates; photographs; and artwork.

**Physical Description/Extent:** 18.5 cu. ft.

**Series:**

**Series I.** Genealogical charts & materials, 1973-1980

**Series II.** Posters, 1963-2010

**Series III.** Class photographs, diplomas, & certificates, 1845-1928

**Series IV.** Photographs, 1911-1966

**Series V.** Artwork, 1972-2001

**Accession Number:** Numerous donors contributed to this collection.

**Language:** English and some Latin

**Stack Location:** Closed stacks map room

**Repository:** Special Collections Division, Nashville Public Library,  
615 Church St., Nashville, TN 37219

### **Scope and Content of the Collection**

Genealogical charts of prominent families and related materials; posters related to Nashville and Tennessee events and history; diplomas; certificates; photographs; and artwork. See series descriptions for more detailed information.

### **Organization/Arrangement of Materials**

Items are grouped by subject matter and format into drawers. A few items are rolled in boxes on shelves in the Map Room.

### **Restrictions**

**Restrictions on Access:**

Library use only.

**Restrictions on Use and Reproduction:**

Some items may be restricted by copyright law or donor restriction.

All rolled or bound items, all original artwork, and any items larger than 8.5 x 14 inches must receive staff permission before photocopying to avoid damage to materials. Some items may not be able to be photocopied due to size, condition, or format.

## **Index Terms**

### **Personal Names:**

Aguila, Dani  
Bennett, Charlene Alberta  
Benson, Florence Elizabeth  
Blount, William, 1749-1800  
Brinkley, Charles -- Posters  
Brown family  
Burt, Jesse Clifton, 1921- -- Portraits  
Callicott, Burton, 1907- -- Posters  
Card, George  
Creighton family  
Davis, Sam, 1842-1863 -- Pictorial works  
Dillin, Mary Lucile  
Donelson, Mary Hooper  
Douglas, Aaron -- Posters  
Forrest, Nathan Bedford, 1821-1877 -- Pictorial works  
Gaul, Gilbert William, 1855-1919 -- Posters  
Goodpasture, Henry  
Harding family  
Harmon, Paul, 1939- -- Posters  
Hayes, Oliver  
Hull, Cordell, 1871-1955  
Hyman, Sylvia  
Jackson, Andrew, 1767-1845  
Jesus Christ -- Genealogy  
Johnson, Andrew, 1808-1875  
Lambeth, William Hardie  
Lee, Robert E. (Robert Edward), 1807-1870 -- Pictorial works  
Lovell, Ellen  
McKissack, Pat, 1944-  
O'Callaghan, Helen Claire  
Phillips, Carey Henrietta  
Polk, James K. (James Knox), 1795-1849  
Ready, Charles Edmond  
Ready, Earl Edmond  
Robertson family  
Robertson, James, 1742-1814  
Sequoyah, 1770?-1843  
Sevier, John, 1745-1815  
Stephens, J. Bunyan  
Stephens, Ophelia Elizabeth  
Sublett, Carl, 1919- -- Posters  
Tillman, G. N. (George Newton), 1851-1923

Voorhies, Alice Foster  
Washington, George, 1732-1799 -- Family  
Weakley, Samuel Anderson, 1887-1973  
Wells-Barnett, Ida B., 1862-1931  
Wiley, Catherine, 1879-1958 -- Posters  
Williams, Eva Mary  
York, Alvin Cullum, 1887-1964

**Corporate Names/Organizations:**

Association of American Editorial Cartoonists  
Central High School (Nashville, Tenn.)  
Cheekwood Museum of Art  
Community Chest (Nashville, Tenn.)  
Country Music Hall of Fame & Museum (Nashville, Tenn.)  
East End United Methodist Church (Nashville, Tenn.)  
Fisk University. Jubilee Hall  
Fogg High School (Nashville, Tenn.)  
Freedom Forum First Amendment Center at Vanderbilt University  
Freemasons. Grand Lodge of Tennessee  
General (Locomotive) -- Pictorial works  
General Motors Corporation. Truck Sales (Nashville, Tenn.) -- Pictorial works  
Horticultural Society of Davidson County (Tenn.)  
Hume-Fogg High School (Nashville, Tenn.)  
Jack Daniel Distillery -- Pictorial works  
Junior League of Nashville  
Nashville Conservatory of Music (Tenn.)  
Nashville Municipal Auditorium (Nashville, Tenn.)  
Oaklands (Murfreesboro, Tenn.) -- Pictorial works  
Old Beech Church (Sumner County, Tenn.) -- Pictorial works  
Peabody Normal College  
Ryman Auditorium (Nashville, Tenn.) -- Pictorial works  
Scottish Rite (Masonic order) -- Tennessee -- Nashville  
Super Service (Nashville, Tenn.) -- Pictorial works  
Tennessee 200, Inc.  
Tennessee Botanical Gardens and Fine Arts Center  
Tennessee Historical Commission  
Tennessee Homecoming '86  
Tennessee Performing Arts Center  
Tennessee State Museum  
Union Station (Nashville, Tenn.) -- Pictorial works  
University of Nashville  
University of Nashville. Medical Dept.  
University of Nashville. Agatheridan Society  
Vanderbilt University. Law School  
War Chest (Nashville, Tenn.)  
Warner Elementary School (Nashville, Tenn.)  
West Nashville High School (Nashville, Tenn.)

**Conference Names:**

American Artisan Festival -- Posters  
Intermedia Balloon Classic -- Posters  
Market Street Festival (Nashville, Tenn.) -- Posters  
Sinking Creek Film Celebration -- Posters  
Southern Festival of Books -- Posters  
Tennessee Archaeology Awareness Week -- Posters

**Subjects:**

Archaeology -- Tennessee -- Posters  
Art museums -- Tennessee -- Nashville -- Exhibitions  
Art -- Tennessee -- Nashville -- Exhibitions  
Artists -- Tennessee -- Posters  
Associations, institutions, etc.--Tennessee--Nashville  
College students -- Tennessee -- Nashville  
Commercial art -- Tennessee -- Nashville  
Entertainment events--Tennessee--Nashville  
Festivals -- Tennessee -- Nashville  
Freedom of speech -- Tennessee  
Governors -- Tennessee -- Pictorial works  
High schools -- Tennessee -- Nashville.  
Historical museums -- Tennessee -- Nashville -- Exhibitions  
Indians of North America -- Tennessee  
Irish Americans -- Posters  
Learned institutions and societies -- Tennessee -- Nashville.  
Nashville, Battle of, Nashville, Tenn., 1864 -- Pictorial works  
Parks -- Tennessee -- Nashville  
Popular culture -- Tennessee -- Nashville  
Prehistoric peoples -- Tennessee  
Presidents -- United States -- Pictorial works  
Public schools -- Tennessee -- Nashville  
Public spaces -- Tennessee -- Nashville  
School children -- Tennessee -- Nashville  
Schools -- Tennessee -- Nashville  
Universities and colleges -- Tennessee -- Nashville  
Women -- Tennessee -- History  
Zoos -- Tennessee -- Nashville

**Places:**

Centennial Park (Nashville, Tenn.)  
Confederate States of America -- History -- Pictorial works  
Grassmere Wildlife Park (Tenn.) -- Posters  
James Robertson Parkway (Nashville, Tenn.)  
Lynchburg (Tenn.) -- Pictorial works  
Nashville (Tenn.) -- Description and travel  
Nashville (Tenn.) -- History -- Sources.  
Nashville (Tenn.) -- Intellectual life.

Nashville (Tenn.) -- Public Schools  
Nashville (Tenn.) -- Social life and customs  
Nashville (Tenn.) -- Anniversaries  
Riverfront Park (Nashville, Tenn.)  
Shy's Hill (Nashville, Tenn.) -- Pictorial works  
Sumner County (Tenn.) -- Pictorial works  
Tennessee Civil War National Heritage Area.  
Tennessee -- History -- Sources  
Tennessee -- Biography  
Tennessee -- Capital and capitol -- Pictorial works  
Tennessee -- Centennial celebrations, etc.  
United States -- History -- Civil War, 1861-1865 -- Pictorial works

**Genre/Document Types:**

Aerial photographs  
Certificates  
Diplomas  
Genealogies  
Photographs  
Posters  
Prints (visual works)  
Works of art

**Occupations:**

Artists  
Governors  
Politicians  
Presidents

**Added Entries – Personal Names:**

Aguila, Dani  
Andrews, Gene  
Bennett, Alfred  
Creighton, Wilbur F., 1906-2004  
Goff, Reda C., 1906-2000  
Green, Alvin E.  
Hankins, Cornelius Haly, 1863-1946  
Henry, Alice Gwin  
Horton, G. W.  
McKissack, Pat, 1944-  
Moore, Batsell  
Quest, Dan  
Thompson, Connie, artist  
Umberger, Chris

**Added Entries – Corporate Names:**

Ambiance Fine Arts (Nashville, Tenn.)  
Association of American Editorial Cartoonists  
Cheekwood Museum of Art  
Community Chest (Nashville, Tenn.)  
Elder's Bookstore (Nashville, Tenn.)  
Freedom Forum First Amendment Center at Vanderbilt University  
Hatch Show Print (Firm)  
Historic Nashville, Inc.  
Horticultural Society of Davidson County (Tenn.)  
Tennessee 200, Inc.  
Tennessee Botanical Gardens and Fine Arts Center  
Tennessee Historical Commission  
Tennessee Homecoming '86  
Tennessee State Museum  
War Chest (Nashville, Tenn.)

**Added Entries – Conference Names:**

American Artisan Festival  
Intermedia Balloon Classic  
Market Street Festival (Nashville, Tenn.)  
Sinking Creek Film Celebration  
Southern Festival of Books  
Tennessee Archaeology Awareness Week

**Separated Material**

"Shy's Hill" by R. McDonald, ca.1966 painting in frame.  
Location: Closed stacks workroom range 4 section 2

**Administrative Information**

**Copyright:** Some material may be protected by copyright law (Title 17 U.S. Code) or donor restriction.

**Preferred Citation:** [specific item citation], [series name], Nashville Room Oversize Collection, Special Collections Division, Nashville Public Library.

**Immediate Source of Acquisition:** Numerous donors contributed to this collection.

**Processing Information:** Rehoused by volunteers Rose Mary Reed, and Marty O'Reilly; preservation work by Rose Mary Reed; under direction of staff member Linda Barnickel, 2006-2007.

**Accruals:** Additional accruals are expected.

## **Detailed Description of the Collection**

### **Series I. Genealogical Charts, 1973-1980, 2 cu. ft.**

#### **Series Abstract/Description:**

Genealogical pedigree charts for several prominent Nashville families, including James Robertson, and other oversize materials of genealogical interest.

#### **Container List:**

##### **Drawer K-1 (unless otherwise noted)**

###### **Subseries A: Local families**

Creighton Family, 1960 rev. 1980 (script copy)

Creighton Family, 1980 (typed)

Gen. James Robertson Family, 1973 by Sarah [Foster] Kelley

Thomas Harding (2 different charts)

Donelson Family by Wirt Armisted Cate

###### **Subseries B: General**

Adam & Eve Family Tree Chart (lineage to Jesus) and genealogy of many other Biblical figures, 1977

The Washington Connection – a Royal Pedigree (George Washington)

Genealogical fan chart (blank)

The Official Tartan Map, 1976. by John Telfer Dunbar & Don Pollinger (published by Crown Publishers, Inc.)

### **Series II. Posters, 1978-2010, 4 cu. ft.**

#### **Series Abstract/Description:**

Posters for Nashville area attractions, events, and historical subjects, including the Southern Festival of Books, the Tennessee State Museum, historical/biographical posters published by the Tennessee Historical Commission, events at local parks, items related to Homecoming '86 and the State Bicentennial, Market Street Festival, and a variety of other subjects, locations, and sponsoring organizations.

#### **Container List:**

##### **Drawer K-2 (unless otherwise noted)**

Southern Festival of Books

1989-2012, 2015, 2016

Tennessee Historical Commission.

Governor Wm. Blount

Sequoyah, 1988

Sergeant York, 1987

Ida B. Wells, n.d.

James Robertson, n.d.

Jackson/Polk/Johnson, 1989

John Sevier, 1996

Cordell Hull, 1995  
 Tennessee Archaeology Awareness Week  
 1996-2000  
 Tennessee State Museum.  
 Old Hickory, 1991  
 Field to Factories. Afro-American Migration 1915-1940, (1992)  
 Songs from the Hills, 1994  
 Witness to the Light. Civil Rights Struggle in Nashville 1957-1964, (1993)  
 Is It True What They Say About Dixie – Myths & Realities of the  
 Antebellum South, 1984  
 A Chronological History of Northern Davidson County 1779-1981  
 Tennessee Women's History, n.d. (pre-1996)  
 Tennessee's Governors, n.d.  
 Ulster American Heritage Trail, n.d.  
 Sam Davis 1842-1963, n.d.  
 Presidents of the U.S. Washington to Kennedy, n.d.  
 Icon's Project: Open Door, n.d. (Intermuseum Council of Nashville)  
 "Tennessee: A Bicentennial Legacy of First Amendment Pioneers" (Freedom  
 Forum), 1996  
 Trees of Christmas (Cheekwood & Horticultural Society of Davidson Co.), 1980,  
 n.d.

**Drawer K-3 (unless otherwise noted)**

George N. Tillman, Republican for Governor (c. 1896 or c. 1908)  
 Nashville Community and War Chest poster, c.1945  
 Intermedia Balloon Classic, 1998 (signed by the artist George Card)  
 American Artisan Festival (at Centennial Park), 1996 & 2000  
 "Busted Rock for Country" groundbreaking Country Music Hall of Fame, 1999  
 (by Hatch Show Print)  
 Celebrate Families, 2002 (by Hatch Show Print)  
 4<sup>th</sup> of July Celebration, 2002 (by Hatch Show Print)  
 Charles Brinkley. Ordered Prospects. Cheekwood, 1982  
 Charles Brinkley. Ambiance Fine Arts, 1984  
 Tennessee State Capital. Exterior Restoration, 1986  
 Grassmere Wildlife Park, 1991  
 Sinking Creek Film Celebration, 1982  
 Homecoming '86  
 Tennessee Homecoming '86 Literary Festival  
 Homecoming '86 Postcard Contest  
 Celebrate – Grand Opening of Riverfront Park, 1983  
 Riverfront Park. Grand Opening, 1983  
 Reserve Your Place in History (Bicentennial brick)  
 Tennessee 32 cent postage stamp poster, 1996  
 Tennessee Civil War National Heritage Area, c.1999  
 Market Street Festival  
 1981



1984  
1987  
1988  
c.1989  
n.d. (3 different posters)

**Series III. Class Photographs, Diplomas, and Certificates, 1845-1928, 4 cu. ft.**

**Series Abstract/Description:**

Diplomas and certificates, most relating to schools, particularly Hume Fogg High School and University of Nashville. Some items may relate to churches or other organizations. Photographs concern schools. Many items are *extremely fragile* and require great care when handling.

**Container List:**

**Subseries A: Class Photographs, 1892-1927**

**Drawer L-3 (unless otherwise noted)**

Central High School. Senior Class & Faculty. 1926-1927.

University of Nashville. Class of 1892.

Peabody Normal College, L.I. Class of 1901

*Fogg and Hume-Fogg class photos formerly found here have been removed and are now part of the Hume-Fogg High School Collection.*

**Subseries B: Diplomas and Certificates, 1845-1918**

**Drawer L-4 (unless otherwise noted)**

Folder 1:

Conservatory of Music. Nashville. Diploma. Ellen Lovell, 1905

Fogg High School. Nashville Public Schools. Diploma. Samuel Anderson Weakley, 1907.

Warner School. Nashville Public Schools. Document. Anderson Weakley, 1904

Howard School. Grammar Dept. Nashville Public Schools. Florence Elizabeth Benson, 1918.

Ancient & Accepted Scottish Rite document, in Latin. William Hardie Lambeth, 1913

Folder 2:

University of Nashville. Diploma, Charles Edmond Ready, 1849

University of Nashville. Diploma, Earl Edmond Ready, 1849

University of Nashville. Diploma, \_\_. \_\_. \_\_. Brown, 1853

University of Nashville Societas Agatheridana document. Oliver Hayes, 1846

University of Nashville document. Oliver Hayes, 1846

Folder 3:

Nashville High School. Diploma. Ophelia Elizabeth Stephens, 1879

University of Nashville Medical School Diploma. J. Bunyan Stephens, 1868

Folder 4:

East End Junior League certificate, East End Methodist Episcopal Church, South,  
1896

Vanderbilt University Diploma. Bachelor of Law. Henry Goodpasture, 1881

West Nashville High School Diploma. Eva Mary Williams, 1905

Folder 5:

University of Nashville Societas Agatheridana document, many signatures, but  
apparently incomplete, 1845 (mounted)

Folder 6:

*Hume-Fogg diplomas formerly housed in Folder 6 have been removed and are  
now part of the Hume-Fogg High School Collection. Folder 6 no longer exists (as  
of Oct. 2011).*

Folder 7:

Diploma. U.S. Military Academy (West Point). Landon Garland Daniel, 1918

**Series IV. Photographs, 1911-1966, 2 cu. ft.**

**Series Abstract/Description:**

Photographs of a wide variety of subjects, including aerial photographs of Nashville or  
specific buildings or locations within Nashville, and panoramic group portraits. Some  
items are extremely fragile and require great care when handling.

**Container List:**

**Drawer M-2 (unless otherwise noted)**

Folder 1:

Masonic Lodge Photograph, 1911. (P-4580) *Extremely Fragile!!*

Staff: This photograph must always be returned to the *top* of materials in this  
drawer!

Folder 2:

Aerial View of GMC truck sales inc., n.d. (drawing)

Aerial View of Super Service, n.d. (drawing)

Folder 3:

Nashville Birdseye View, c.1963 (view of James Robertson Parkway, Municipal  
Auditorium, and Capitol)

Birdseye View. Night Comes to Nashville, c.1962

Nashville. Country Music Hall of Fame & Museum, n.d.

Nashville. Country Music Hall of Fame & Museum, (closer view, at angle)n.d.

Aerial View of Nashville, n.d.

Folder 4:

Aerial Photograph Downtown Nashville, c. 1951-52 (P-4579)

Folder 5:

Nashville Bar Association, 1966

Loose items:

Aerial photograph of a residential area (long narrow format), n.d.

Photograph of a large unidentified group of people dated June 6, 1912 by  
Associated Photo Co., Louisville, KY.  
Hume Fogg High School building. Photograph, c.1960? *Condition note: Large  
tear on left side.*

**Series V. Artwork, c.1966-2001, 4.5 cu. ft.**

**Series Abstract/Description:**

Various original artwork or reproductions, some signed and numbered by the artist.  
Includes some Nashville and Tennessee artists. Nashville subjects include skylines,  
buildings, commemorative artwork for special events, and the Civil War.

**Container List:**

**Drawer M-4 (unless otherwise noted)**

Dani Aguila artwork:

United States Presidential Line, 1976 (signed and numbered)  
Poster 25<sup>th</sup> Annual Convention of the Association of  
American Editorial Cartoonists, 1981  
(1 signed and dated; 1 copy w/ no autograph)  
Poster Annual Convention of the Association of American  
Editorial Cartoonists, 1991

William Creighton, Jr. drawings:

Nashville Skyline from Vanderbilt Hospital by William Creighton, Jr.,  
Oct. 1992  
Nashville, Tennessee 2000. 1995 by William Creighton, Jr. (large and  
small copy)

Dan Quest woodcut prints:

Jack Daniels Distillery Barrelhouse, 1977 (signed, 1731/2000)  
Bethel Cemetery, Lynchburg, Tenn., 1974 (signed, 743/2000)

Still life by Carl Sublett, Art Award Committee Poster. Tennessee State Center  
for Performing Arts, n.d.

Nashville Skyline Bicentennial 1776-1976 by Alvin E. Green, 1975 (RT-257)

Civil War still life painting by G. W. Horton (original)

General View of Nashville print. (reprint by Elder's, dated 1973 and numbered)

Oaklands, Murfreesboro, Tennessee by Connie Thompson, c. 1972

Lithograph of silhouette of Andrew Jackson, 1944 (may be a copy)

Old Beech Church. Sumner County, Tennessee by Alfred Bennett (signed, not  
dated)

Poster for children's book: Goin' Someplace Special by Patricia McKissack and  
proof pages of the book, 2001

Print of Union Station by Charles Hooper (numbered 64/1000)

"It's a Question of Priorities," browntone print of Union Station by [Chris]  
Umberger, 1975 (18 of 65)

Portrait of Jesse Burt, n.d. (original)

Lithograph of the locomotive "General", n.d.

General View of the City of Nashville (hand-colored engraving, possibly from  
*Harper's Weekly*, March 8, 1862)

Poster of the Grand Ole Opry House (Ryman Auditorium) by Batsell Moore,  
1972

Color Print of Union Station, n.d.

Lithograph of Jubilee Hall, Fisk, n.d.

Photo collage of Union Station, color, n.d.

**Drawer M-5 (unless otherwise noted)**

Aaron Douglas, Fisk University, n.d.

Nashville, Tennessee Skyline pen & ink drawing, Mar. 20, 1989 by Reda C. Goff

Tennessee Bicentennial print by Alice Gwin Henry (signed), 1996

"The South Revisited," Alfred R. Waud exhibit, 1981. Poster features sketch of  
view of Nashville from Edgefield

"Portrait of the Artist," Mary Hooper Donelson exhibit at Cleveland Hall Farm,  
1992

Tennessee State Museum Posters:

Southern Impressionists-The Art of Catherine Wiley

Gilbert Gaul-American Realist

Burton Callicott-A Retrospective

Paul Harmon

Portrait Painting in Tennessee

Sylvia Hyman "Clay Works 1964-1994" (1995)

Civil War Artwork:

Nathan B. Forrest print by Gene Andrews. 3 copies: Prints 558/750,  
626/750, 153/750

Robert E. Lee print by Gene Andrews. 2 copies: Prints 626, 558

"Holding the Line at All Hazards" by Gilbert Gaul (rep. 1972 by Elder's  
Bookstore)

"Leaving Home" by Gilbert Gaul

"Between the Lines" by Gilbert Gaul (rep. 1985 by Elder's Bookstore)

"First At Vicksburg" (no artist named)

"The Picket" by Gilbert Gaul

"The Forager" by Gilbert Gaul

General Robert E Lee by Cornelius Hankins lithographic reproduction

"Shy's Hill" by R. McDonald, ca.1966 painting in frame.

Location: Closed stacks workroom range 4 section 2
